# Supplementary material for: A Novel Podophage StenR_269 Suggests a New Family in the Class Caudoviricetes
Source: MDPI journal article supplement (doi:10.3390/v15122437), 2023-12-15
Supplement: s1 [file s1]

| No | No CEMTC          | Isolation source     | Date of isolation | Species identification using 16SrRNA sequencing                | GenBank ID      |
|----|-------------------|----------------------|-------------------|----------------------------------------------------------------|-----------------|
| 1  | 1878              | animal               | 2014.05.22        | Stenotrophomonas sp. (S.maltophilia/[Pseudomonas] hibiscicola) | MZ424751        |
| 2  | 2142              | environmental        | 2015.04.07        | Stenotrophomonas maltophilia                                   | MZ424754        |
| 3  | 1947              | environmental        | 2012.11.26        | Stenotrophomonas sp. (S. lactitubi/"S. cyclobalanopsidis")     | MZ424758        |
| 4  | 3963              | environmental        | 2020.10.06        | Stenotrophomonas sp. (S.maltophilia/[Pseudomonas] hibiscicola) | MZ424759        |
| 5  | 6992              | environmental        | 2022.08.14        | Stenotrophomonas maltophilia                                   | OQ353082        |
| 6  | 7417              | environmental        | 2022.08.24        | Stenotrophomonas rhizophila                                    |                 |
| 7  | 5250              | environmental        | 2021.10.28        | Stenotrophomonas lactitubi                                     | OQ913916        |
| 8  | 4548              | environmental        | 2021.10.28        | Stenotrophomonas chelatiphaga                                  | OP393921        |
| 9  | 4550              | environmental        | 2021.10.28        | Stenotrophomonas sp.                                           | ON838135        |
| 10 | 4565 <sup>1</sup> | <b>environmental</b> | <b>2021.10.28</b> | <b>Stenotrophomonas rhizophila</b>                             | <b>OP393922</b> |
| 11 | 4860              | environmental        | 2021.10.28        | Stenotrophomonas rhizophila                                    | ON838137        |
| 12 | 3863              | environmental        | 2019.10.14        | Stenotrophomonas rhizophila                                    | MZ424756        |
| 13 | 3880              | environmental        | 2019.10.24        | Stenotrophomonas rhizophila                                    | MZ424757        |
| 14 | 5179              | environmental        | 2021              | Stenotrophomonas bentonitica                                   |                 |
| 15 | 5206              | environmental        | 2021.11.04        | Stenotrophomonas chelatiphaga                                  | OP393923        |
| 16 | 5208              | environmental        | 2021.11.04        | Stenotrophomonas rhizophila                                    | OP393924        |
| 17 | 5297              | environmental        | 2022.04.22        | Stenotrophomonas chelatiphaga                                  | OP393925        |
| 18 | 5540              | environmental        | 2021.11.10        | Stenotrophomonas chelatiphaga                                  | OQ353080        |
| 19 | 6173              | environmental        | 2022.05.11        | Stenotrophomonas rhizophila                                    | OQ353081        |
| 20 | 6445              | environmental        | 2021              | Stenotrophomonas sp (S. rhizophila/S. bentonitica)             |                 |
| 21 | 6500              | environmental        | 2022.05.14        | Stenotrophomonas rhizophila                                    |                 |
| 22 | 6504              | environmental        | 2022.05.14        | Stenotrophomonas rhizophila                                    | OP703677        |
| 23 | 6609              | environmental        | 2022.07.17        | Stenotrophomonas rhizophila                                    | OP703679        |
| 24 | 7007              | environmental        | 2022.07.21        | Stenotrophomonas rhizophila                                    |                 |
| 25 | 7607              | environmental        | 2022.05.15        | Stenotrophomonas sp. (S. lactitubi/"S. cyclobalanopsidis")     | OQ353083        |
| 26 | 7824              | environmental        | 2022.05.14        | Stenotrophomonas maltophilia group                             |                 |
| 27 | 8351              | environmental        | 2022.10.22        | Stenotrophomonas lactitubi                                     | OQ913918        |
| 28 | 8210              | environmental        | 2022.10.15        | Stenotrophomonas lactitubi                                     | OQ913917        |
| 29 | 4523              | environmental        | 2021.10.27        | Stenotrophomonas chelatiphaga                                  | OP393920        |
| 30 | 5438              | environmental        | 2022.05.07        | Stenotrophomonas sp.                                           | OP393926        |
| 31 | 5471              | environmental        | 2022.05.02        | Stenotrophomonas sp.                                           | OP393927        |
| 32 | 5507              | environmental        | 2022.05.01        | Stenotrophomonas rhizophila                                    | OQ353079        |
| 33 | 5635              | environmental        | 2022.05.02        | Stenotrophomonas rhizophila                                    | OQ834583        |
| 34 | 6565              | environmental        | 2022.07.21        | Stenotrophomonas tumulicola                                    | OP703678        |
| 35 | 7619              | environmental        | 2022.05.29        | Stenotrophomonas sp. (S. lactitubi)                            | OQ353084        |
| 36 | 1628              | environmental        | 2013.05.13        | Stenotrophomonas acidaminiphila                                | MZ424752        |
| 37 | 1588              | environmental        | 2013.04.13        | Stenotrophomonas pavanii                                       | MZ424753        |
| 38 | 1403              | environmental        | 2012.09.14        | Stenotrophomonas rhizophila                                    | MZ424755        |
| 39 | 4286              | environmental        | 2021.08           | Stenotrophomonas sp.                                           | OP393919        |
| 40 | 7254              | human                | 2022.09           | Stenotrophomonas geniculata                                    |                 |

|    |      |               |            |                                                                                                 |          |
|----|------|---------------|------------|-------------------------------------------------------------------------------------------------|----------|
| 41 | 7300 | human         | 2022.09    | <i>Stenotrophomonas</i> sp. ( <i>S. geniculata</i> /[ <i>Pseudomonas</i> ] <i>hibiscicola</i> ) | OQ353085 |
| 42 | 7260 | human         | 2022.09    | <i>Stenotrophomonas geniculata</i>                                                              |          |
| 43 | 7315 | human         | 2022.09    | <i>Stenotrophomonas geniculata</i>                                                              |          |
| 44 | 6838 | human         | 2022.09    | <i>Stenotrophomonas</i> sp. ( <i>S. geniculata</i> /[ <i>Pseudomonas</i> ] <i>hibiscicola</i> ) | OP703680 |
| 45 | 2164 | human         | 2015.05.26 | <i>Stenotrophomonas maltophilia</i>                                                             | MZ424760 |
| 46 | 2355 | human         | 2016.01.26 | <i>Stenotrophomonas maltophilia</i>                                                             | OP393915 |
| 47 | 2356 | human         | 2016.01.26 | <i>Stenotrophomonas maltophilia</i>                                                             |          |
| 48 | 3806 | human         | 2019.10.23 | <i>Stenotrophomonas maltophilia</i>                                                             | MZ424764 |
| 49 | 4255 | human         | 2017.07.11 | <i>Stenotrophomonas pavanii</i>                                                                 | OP393916 |
| 50 | 3051 | human         | 2017.10    | <i>Stenotrophomonas maltophilia</i>                                                             | MZ424761 |
| 51 | 3052 | human         | 2017.10    | <i>Stenotrophomonas maltophilia</i>                                                             | MZ424761 |
| 52 | 3128 | human         | 2017.10.17 | <i>Stenotrophomonas maltophilia</i>                                                             | MZ424768 |
| 53 | 2329 | human         | 2016.01.07 | <i>Stenotrophomonas maltophilia</i>                                                             | MZ424765 |
| 54 | 2517 | human         | 2016.03.29 | <i>Stenotrophomonas maltophilia</i>                                                             | MZ424766 |
| 55 | 2650 | human         | 2016.07.11 | <i>Stenotrophomonas maltophilia</i>                                                             | MZ424767 |
| 56 | 4125 | human         | 2021.02.11 | <i>Stenotrophomonas maltophilia</i>                                                             | MZ424762 |
| 57 | 4225 | human         | 2021.06.24 | <i>Stenotrophomonas maltophilia</i>                                                             |          |
| 58 | 4227 | human         | 2021.06.24 | <i>Stenotrophomonas maltophilia</i>                                                             |          |
| 59 | 3453 | human         | 2018.08.21 | <i>Stenotrophomonas</i> sp.                                                                     |          |
| 60 | 3773 | human         | 2019.09.05 | <i>Stenotrophomonas maltophilia</i>                                                             | MZ424763 |
| 61 | 3659 | <b>insect</b> | 2019.04.09 | <i>Stenotrophomonas maltophilia</i>                                                             | MT040043 |
| 62 | 3664 | <b>insect</b> | 2019.04.09 | <i>Stenotrophomonas maltophilia</i>                                                             | MT040044 |
| 63 | 3670 | <b>insect</b> | 2019.04.09 | <i>Stenotrophomonas maltophilia</i>                                                             | MT040045 |
| 64 | 3672 | <b>insect</b> | 2019.04.09 | <i>Stenotrophomonas maltophilia</i>                                                             | MT040046 |

<sup>1</sup>host strain marked with bold
