# Supplementary material for: A Novel Podophage StenR_269 Suggests a New Family in the Class Caudoviricetes
Source: MDPI journal article supplement (doi:10.3390/v15122437), 2023-12-15

Left line: Virus family

Others (15)

Right line: Host group

Pseudomonadota (45)

Virus family  
Host group

49 sequences

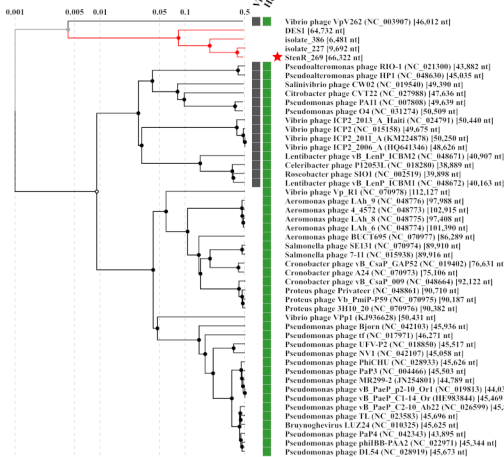

A

%-identity

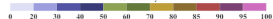

isolate\_227

isolate\_227

9,692 nt

StenR\_269

StenR\_269

66,322 nt

isolate\_386

isolate\_386

6,481 nt

B

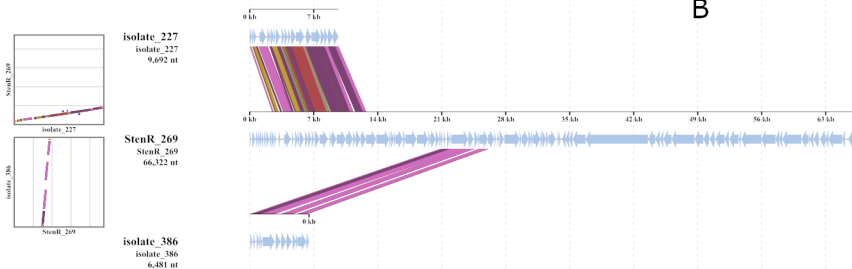

Supplement: s1 [file s1]
