# Supplementary figures and images for: A Novel Podophage StenR_269 Suggests a New Family in the Class Caudoviricetes
Source: MDPI journal article supplement (doi:10.3390/v15122437), 2023-12-15

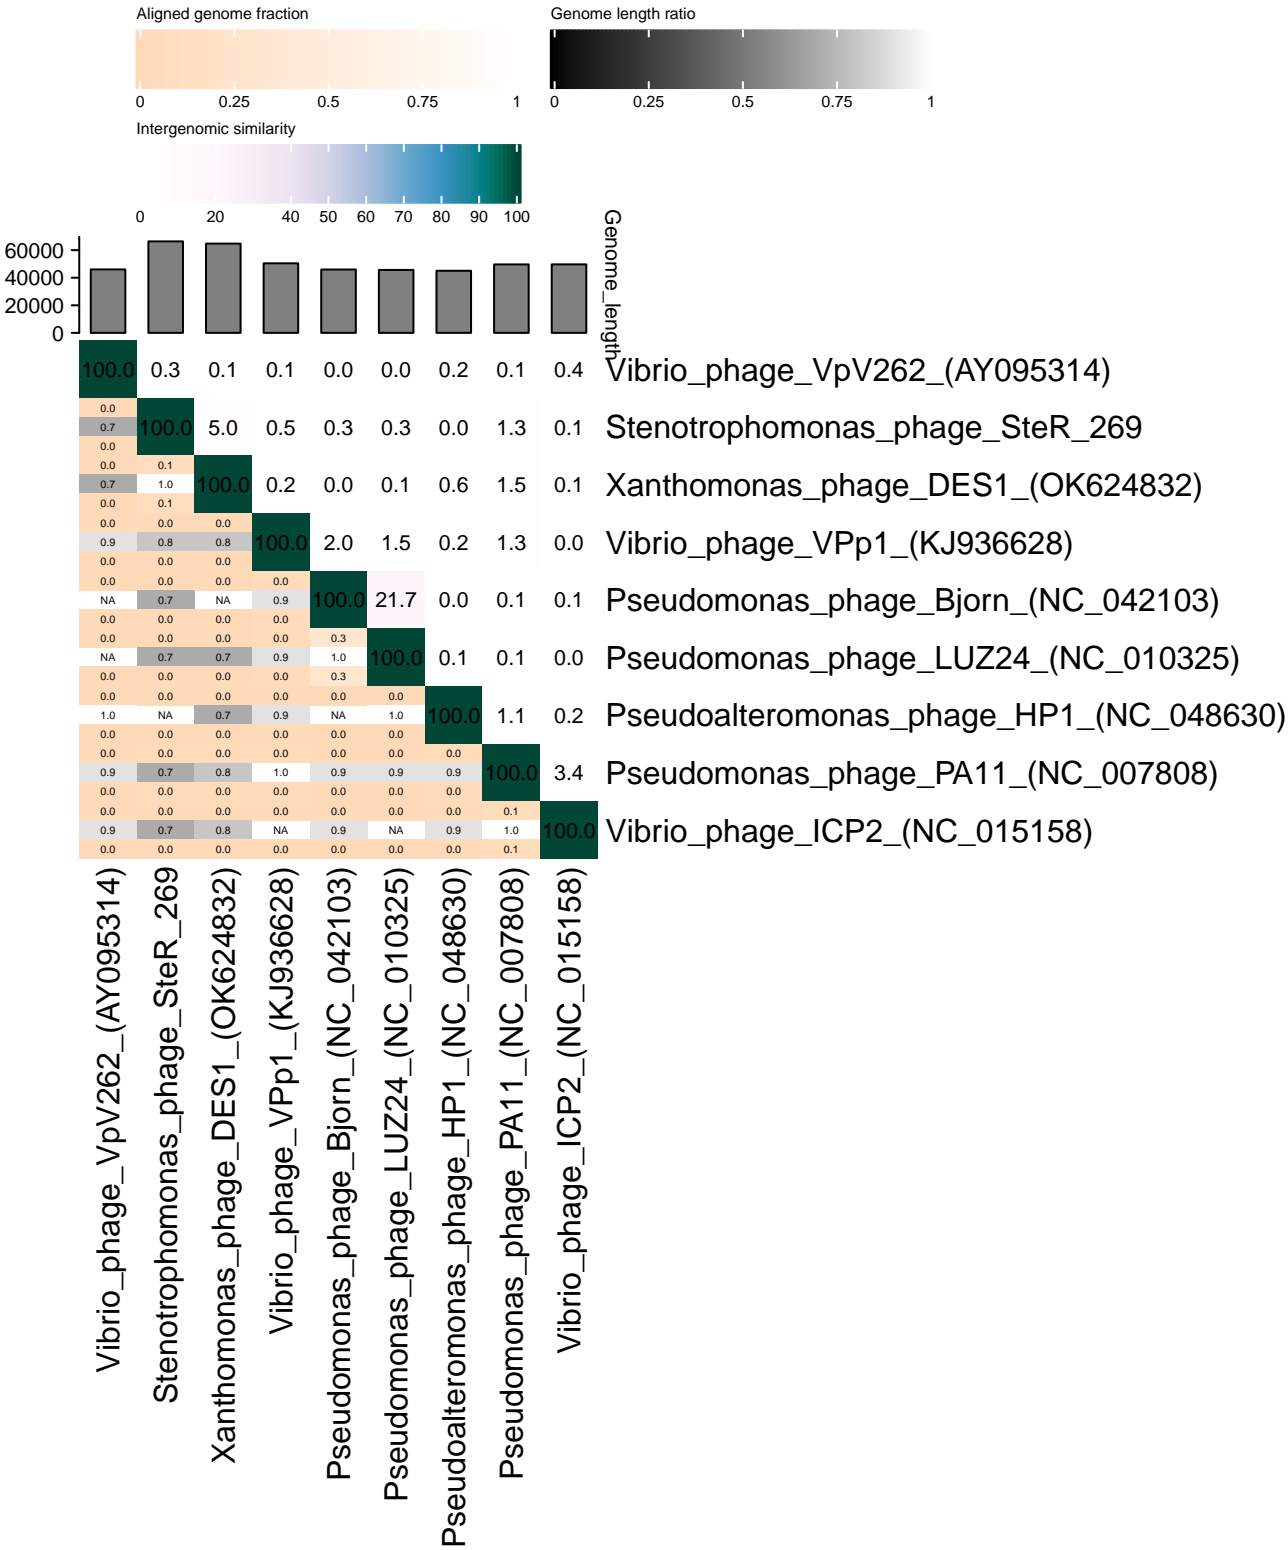

Supplement: s1 [file s1]

SignalP 6.0 prediction: Sequence

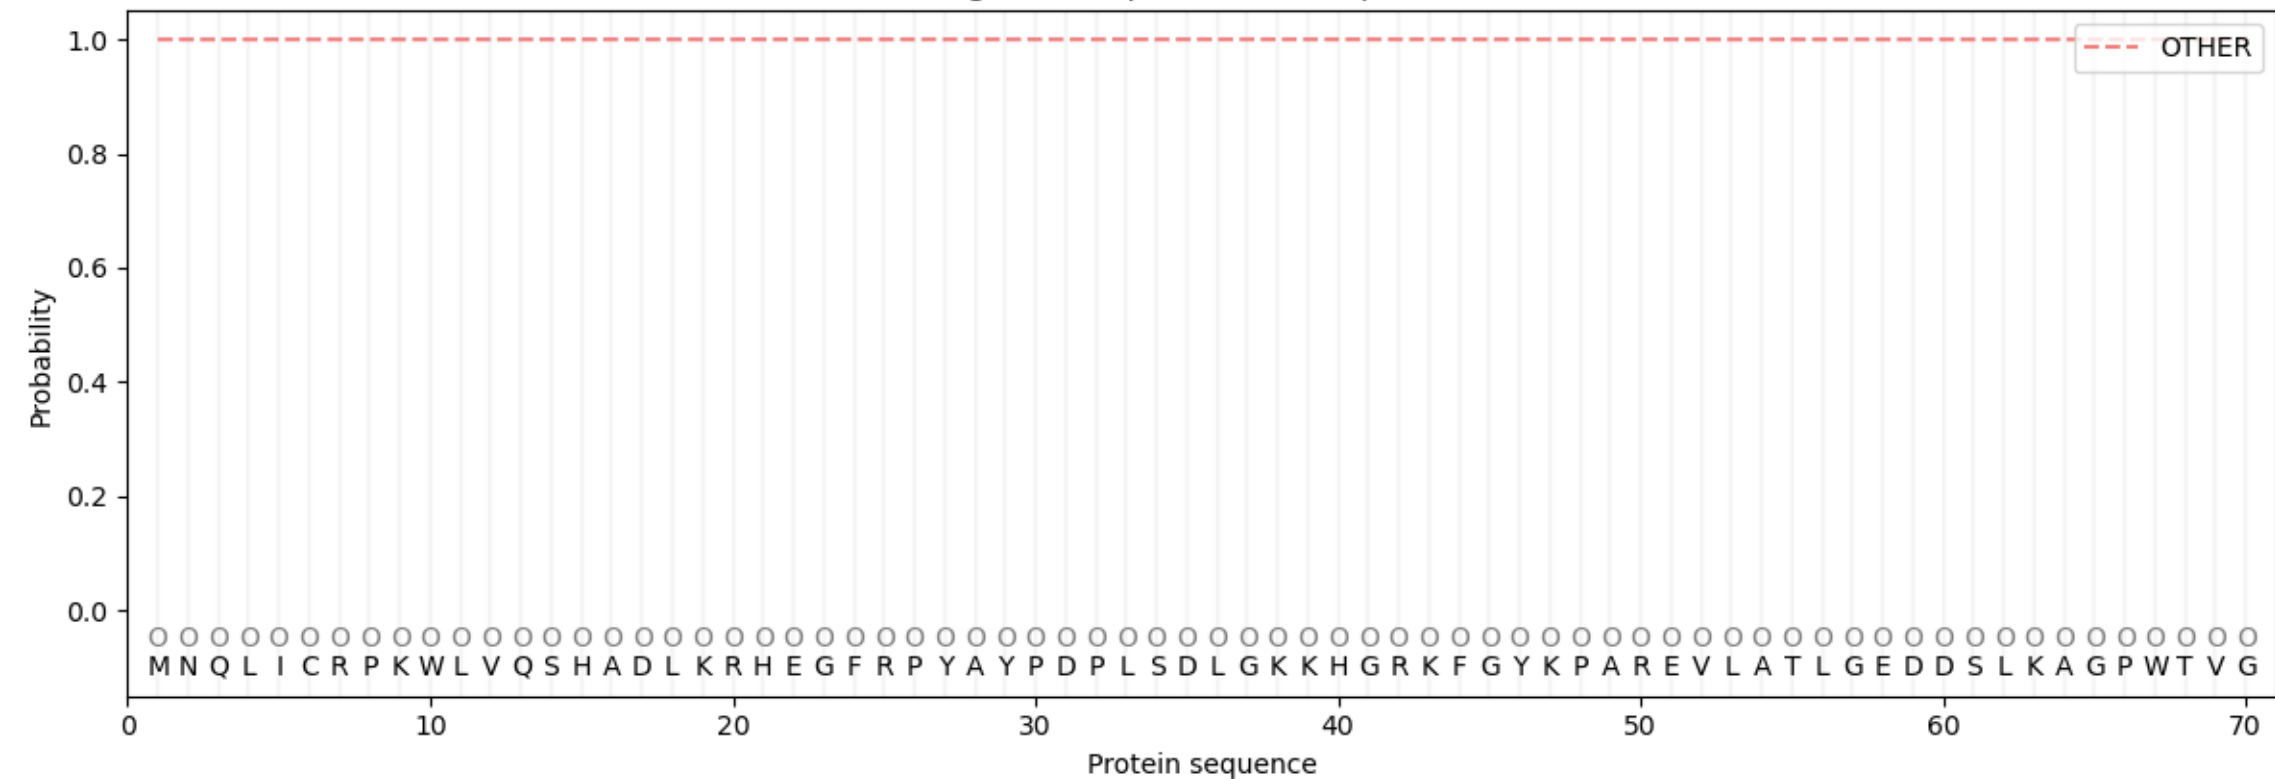

Supplement: s1 [file s1]
